# Supplementary material
Source: PubMed Central journal article supplement (PMC5764175)
Supplement: NIHMS910955-supplement-Supp_TableS1.pdf [file NIHMS910955-supplement-Supp_TableS1.pdf]

Supplemental Table 1

|                                                                        | GABRA_rs279858 |           |           |           |           | GRIK1_rs283247 |            |          |           |         |
|------------------------------------------------------------------------|----------------|-----------|-----------|-----------|-----------|----------------|------------|----------|-----------|---------|
|                                                                        | N              | Total     | CC        | CT        | TT        | p-value        | AA         | AC       | CC        | p-value |
| <b>Positive Alcohol Expectancy Questionnaire Subscale</b>              |                |           |           |           |           |                |            |          |           |         |
| Global change                                                          |                | 43.6 ±3.7 | 44.2 ±3.6 | 44.2 ±3.7 | 42.3±3.7  | 0.14           | 42.5 ± 3.4 | 44.1±3.7 | 43.2 ±3.8 | 0.44    |
| Sexual enhancement                                                     |                | 10.8 ±1.4 | 10.1 ±2.0 | 11.1 ±1.2 | 10.7±1.4  | 0.08           | 10.2 ± 1.9 | 10.9±1.4 | 10.7 ±1.5 | 0.46    |
| Physical and social pleasure                                           |                | 9.6 ±1.4  | 9.5 ±1.6  | 9.7 ±1.3  | 9.5±1.4   | 0.77           | 9.0 ±1.1   | 9.7±1.4  | 9.6 ±1.5  | 0.56    |
| Social assertiveness                                                   |                | 14.3 ±3.0 | 14.6 ±3.6 | 14.3 ±3.1 | 14.0±2.4  | 0.8            | 13.7 ±3.1  | 14.3±3.0 | 14.4 ±3.1 | 0.87    |
| Relaxation and tension reduction                                       |                | 13.2 ±2.7 | 13.6 ±2.6 | 13.2 ±3.0 | 12.9±2.3  | 0.72           | 12.2 ±3.1  | 13.7±2.8 | 12.7 ±2.5 | 0.21    |
| Arousal and aggression                                                 |                | 6.9 ±0.8  | 7.0 ±0.9  | 6.9 ±0.8  | 6.8±0.9   | 0.78           | 6.7 ±0.5   | 6.9±0.8  | 7.0 ±0.8  | 0.53    |
| <b>Negative Alcohol Expectancy Questionnaire Subscale</b>              |                |           |           |           |           |                |            |          |           |         |
| Same day                                                               |                | 28.0 ±7.5 | 26.6 ±6.0 | 28.6 ±7.7 | 28.0±8.3  | 0.69           | 27.5 ±3.6  | 28.2±7.1 | 27.9 ±8.7 | 0.97    |
| Next day                                                               |                | 23.7 ±8.5 | 21.8 ±5.0 | 23.7 ±7.7 | 24.8±11.4 | 0.57           | 25.5 ±7.7  | 24.2±9.3 | 22.5 ±7.5 | 0.62    |
| Longterm                                                               |                | 22.5 ±4.1 | 21.7 ±2.1 | 23.1 ±5.4 | 22.0±1.7  | 0.48           | 22.0 ±1.5  | 22.4±3.7 | 22.8 ±5.0 | 0.87    |
| <b>Self-Rating of the Effects of Alcohol (SRE) Total Score</b>         |                | 5.0±2.7   | 5.1±3.1   | 4.9±2.3   | 5.0±3.0   | 0.98           | 4.8±2.1    | 4.7±2.4  | 5.3±3.1   | 0.55    |
| <b>Short Inventory of Problems - Short Version (SIP2R) Total Score</b> |                | 2.4±3.2   | 2.5±2.3   | 2.3±3.8   | 2.3±2.6   | 0.97           | 1.5±1.2    | 1.8±2.0  | 3.4±4.4   | 0.09    |

### SUPPLEMENTARY INFORMATION (Supplemental Table 1)

Baseline drinking patterns including Alcohol Expectancy Questionnaire (AEQ), and AL – Negative Alcohol Expectancy Questionnaire (NAEQ), and Self-Rating of the Effects of Alcohol (SRE) total score. Also included is the degree of alcohol related problems as measured by the Short Inventory of Problems (SIP-2R). There are no differences across genotype groups for the two variants in *GABRA2* and *GRIK1*.
